# Supplementary material for: Insight to Gene Expression From Promoter Libraries With the Machine Learning Workflow Exp2Ipynb
Source: Front Bioinform. 2021 Oct 14;1:747428. doi: 10.3389/fbinf.2021.747428 (PMC9581000; doi:10.3389/fbinf.2021.747428)
Supplement: Supplementary file 1 [file DataSheet1.xlsx]

## Sheet: README
Author:	Ulf Liebal
Contact:	ulf.liebal@rwth-aachen.de
Parent Article	Insight to gene expression from promoter libraries with the machine learning workflow Exp2Ipynb
Article DOI:	10.3389/fbinf.2021.747428
Content:	Sheet RFClassComp: statistical library data and classification performance results for the promoter library comparison. It also contains results from unpublished promoter library data by Neves et al.
	Sheet ExpPredSeq: Experimental results of the predicted promoters from the random forest classification estimator.

## Sheet: RFClassComp
Reference	Organism	Transcr. Factor	Reporter	Article-ML	ML-Type	Entropy cutoff	Run-Time (s)	# Train	# Test	# Features	Avg Seq Dist	f1 CrossV Mean	f1 CrossV Std	coefficient Var.	f1 Train	f1 Test	GC-content	Top 3 Nucleotides	Top 3 FI	Sum Top 3 FI
This Work	P. put.	sigma70	GFP		RF-Class	0.2	111	56	7	61	0.06	0.43	0.2	0.465116	0.58	0.62	2	[-35:T,-34:T,-35:A]	0.24, 0.1, 0.1	0.44
Rhodius et al. (2010)	E. col	sigmaE	various	PWM	RF-Class	1	116	53	6	121	0.61	0.38	0.18	0.473684	0.81	0.22	10	[-9:G,-6A,-13G]	0.19, 0.12, 0.11	0.42
Meng et al. (2013)	E. col	sigma70	GFP	ANN, SVM	RF-Class	0.2	122	88	10	709	0.16	0.39	0.16	0.410256	0.84	0.12	5	[-74:G,-29:G,-29:A]	0.08, 0.08, 0.06	0.22
Zhao et al. (2020)	E. col	sigma70	GFP	GBT	RF-Class	0.2	143	3188	355	285	0.09	0.61	0.03	0.0491803	0.63	0.65	6	[-28:A,-45:T,-28:G]	0.1, 0.08, 0.06	0.24
Gilman et al. (2019)	G. ther	N.A.	GFP	ANN, PLS	RF-Class	1	116	72	9	397	0.69	0.27	0.16	0.592593	0.99	0.14	20	[-73:A,-26:T,-4:G]	0.05, 0.03, 0.03	0.11
Gilman et al. (2019)	G. ther	N.A.	mOrange	ANN, PLS	RF-Class	1	115	72	9	397	0.69	0.29	0.16	0.551724	1	0.21	128	[-41:A,-1:C,-25:G]	0.03, 0.03, 0.02	0.08
Liu et al. (2018)	B. sub.	sigmaA	GFP	PLS	RF-Class	1	115	185	21	105	0.35	0.56	0.08	0.142857	0.84	0.59	7	[-23:A,-2:A,-12:G]	0.18, 0.11, 0.08	0.37
Meng 40 start	E. col	sigma70	GFP		RF-Class	0.2		75	9	133	0.16	0.22	0.15	0.681818	0.69	0.56				0.31
Meng 40 end	E. col	sigma70	GFP		RF-Class	0.2	115	75	9	129	0.21	0.36	0.14	0.388889	0.71	0.47				0.42
Zhao 30 start	E. col	sigma70	GFP		RF-Class	0.2	121	416	47	121	0.26	0.62	0.08	0.129032	0.66	0.51				0.39
Zhao 40 start	E. col	sigma70	GFP		RF-Class	0.2	128	806	90	161	0.2	0.59	0.05	0.0847458	0.61	0.55				0.43
Zhao 50 start	E. col	sigma70	GFP		RF-Class	0.2	132	1818	203	201	0.09	0.6	0.05	0.0833333	0.54	0.49				0.34
Neves et al (unpubl)	E. col	sigma70	GFP		RF-Class	1	115	85	10	89	0.42	0.6	0.16	0.266667	0.77	0.64				0.63
Neves et al (unpubl)	P. tai	sigma70	GFP		RF-Class	1	117	85	10	89	0.42	0.6	0.14	0.233333	0.87	0.58				0.34

## Sheet: ExpPredSeq
Strain-ID	Sequence	predicted/previous	measured
Mod4_1, Control	GCCCATGGACAAGGCTCTCGCGGCCAGGTACTATTGCACG	9.3423	6.69359
mod4_2, Control	GCCCATGGACAAGGCTCTCGCGGCCAGGTACTATTGCACG	9.3423	6.8756
mod4_3, Control	GCCCATGGACAAGGCTCTCGCGGCCAGGTACTATTGCACG	9.3423	6.61583
mod4_4, Control	GCCCATGGACAAGGCTCTCGCGGCCAGGTACTATTGCACG	9.3423	6.82762
mod4_5, Control	GCCCATGGACAAGGCTCTCGCGGCCAGGTACTATTGCACG	9.3423	6.66675
mod4_6, Control	GCCCATGGACAAGGCTCTCGCGGCCAGGTACTATTGCACG	9.3423	6.35019
mod4_7, Control	GCCCATGGACAAGGCTCTCGCGGCCAGGTACTATTGCACG	9.3423	6.35723
mod4_8, Control	GCCCATGGACAAGGCTCTCGCGGCCAGGTACTATTGCACG	9.3423	6.14321
mod4_9, Control	GCCCATGGACAAGGCTCTCGCGGCCAGGTACTATTGCACG	9.3423	6.05294
Predicted:0-1_1	GCCCATGGACAAGGCTCTCGCGGCCAGGTACAATTGCACG	0(0-16.6)	4.83681	Predicted:0-1 corresponds to Predicted:0-2 in raw data
Predicted:0-1_2	GCCCATGGACAAGGCTCTCGCGGCCAGGTACAATTGCACG	0(0-16.6)	7.80913
Predicted:0-1_3	GCCCATGGACAAGGCTCTCGCGGCCAGGTACAATTGCACG	0(0-16.6)	7.45718
Predicted:0-1_4	GCCCATGGACAAGGCTCTCGCGGCCAGGTACAATTGCACG	0(0-16.6)	6.92316
Predicted:0-1_5	GCCCATGGACAAGGCTCTCGCGGCCAGGTACAATTGCACG	0(0-16.6)	7.12612
Predicted:0-1_6	GCCCATGGACAAGGCTCTCGCGGCCAGGTACAATTGCACG	0(0-16.6)	7.01509
Predicted:0-1_7	GCCCATGGACAAGGCTCTCGCGGCCAGGTACAATTGCACG	0(0-16.6)	7.92575
Predicted:0-1_8	GCCCATGGACAAGGCTCTCGCGGCCAGGTACAATTGCACG	0(0-16.6)	7.58035
Predicted:0-1_9	GCCCATGGACAAGGCTCTCGCGGCCAGGTACAATTGCACG	0(0-16.6)	7.15629
Predicted:0-2_1	GCCCATGGACAAGGCTCTCGCGGCCAGGTATTATTGCACG	0(0-16.6)	6.77197	Predicted:0-2 corresponds to Predicted:0-3 in raw data
Predicted:0-2_2	GCCCATGGACAAGGCTCTCGCGGCCAGGTATTATTGCACG	0(0-16.6)	6.88941
Predicted:0-2_3	GCCCATGGACAAGGCTCTCGCGGCCAGGTATTATTGCACG	0(0-16.6)	6.58194
Predicted:0-2_4	GCCCATGGACAAGGCTCTCGCGGCCAGGTATTATTGCACG	0(0-16.6)	9.75216
Predicted:0-2_5	GCCCATGGACAAGGCTCTCGCGGCCAGGTATTATTGCACG	0(0-16.6)	11.3591
Predicted:0-2_6	GCCCATGGACAAGGCTCTCGCGGCCAGGTATTATTGCACG	0(0-16.6)	10.9222
Predicted:0-2_7	GCCCATGGACAAGGCTCTCGCGGCCAGGTATTATTGCACG	0(0-16.6)	13.5869
Predicted:0-2_8	GCCCATGGACAAGGCTCTCGCGGCCAGGTATTATTGCACG	0(0-16.6)	12.6036
Predicted:0-2_9	GCCCATGGACAAGGCTCTCGCGGCCAGGTATTATTGCACG	0(0-16.6)	8.81433
Predicted:2-1_1	GCCCATTGACAAGGCTCTCGCGGCCACGTATAATTGCACG	2(24.8-35.2)	20.0544	Predicted:2 corresponds to Predicted:2-2 in raw data
Predicted:2-1_2	GCCCATTGACAAGGCTCTCGCGGCCACGTATAATTGCACG	2(24.8-35.2)	21.0287
Predicted:2-1_3	GCCCATTGACAAGGCTCTCGCGGCCACGTATAATTGCACG	2(24.8-35.2)	19.8307
Predicted:2-1_4	GCCCATTGACAAGGCTCTCGCGGCCACGTATAATTGCACG	2(24.8-35.2)	18.2253
Predicted:2-1_5	GCCCATTGACAAGGCTCTCGCGGCCACGTATAATTGCACG	2(24.8-35.2)	17.075
Predicted:2-1_6	GCCCATTGACAAGGCTCTCGCGGCCACGTATAATTGCACG	2(24.8-35.2)	18.3109
Predicted:2-1_7	GCCCATTGACAAGGCTCTCGCGGCCACGTATAATTGCACG	2(24.8-35.2)	17.4051
Predicted:2-1_8	GCCCATTGACAAGGCTCTCGCGGCCACGTATAATTGCACG	2(24.8-35.2)	16.4379
Predicted:2-1_9	GCCCATTGACAAGGCTCTCGCGGCCACGTATAATTGCACG	2(24.8-35.2)	15.8995
